# Supplementary material for: Incorporation of pyrrole to oligothiophene-based quinoids endcapped with dicyanomethylene: a new class of solution processable n-channel organic semiconductors for air-stable organic field-effect transistors
Source: Royal Society of Chemistry journal article supplement (doi:10.1039/c2jm16700j), 2012-01-01
Supplement: c2jm16700j.pdf [file c2jm16700j.pdf]

## *Supporting Information*

# **Incorporation of Pyrrole to Oligothiophene-Based Quinoids Endcapped with Dicyanomethylene: a New Class of Solution Processible n-Channel Organic Semiconductors for Air-Stable Organic Field-Effect Transistors**

Yali Qiao,<sup>a</sup> Jing Zhang,<sup>ab</sup> Wei Xu\*<sup>a</sup> and Daoben Zhu\*<sup>a</sup>

<sup>a</sup> *Beijing National Laboratory for Molecular Sciences, Organic Solids Laboratory,  
Institute of Chemistry, Chinese Academy of Sciences, Beijing 100190, P. R. China*

<sup>b</sup> *Graduate School of Chinese Academy of Sciences, Beijing 100049, P. R. China*

### **Table of the Contents**

|                                                                       |            |
|-----------------------------------------------------------------------|------------|
| §1. TGA data for derivatives <b>3a-c</b> .....                        | <b>S2</b>  |
| §2. DSC data for derivatives <b>3a-c</b> .....                        | <b>S3</b>  |
| §3. Data of X-ray crystallographic analysis.....                      | <b>S4</b>  |
| §4. UV-vis spectra of thin films.....                                 | <b>S5</b>  |
| §5. Structural isomers in solution state.....                         | <b>S6</b>  |
| §6. Copies of <sup>1</sup> H NMR and <sup>13</sup> C NMR spectra..... | <b>S9</b>  |
| §7. References.....                                                   | <b>S15</b> |

## 1. TGA data for derivatives 3a-c

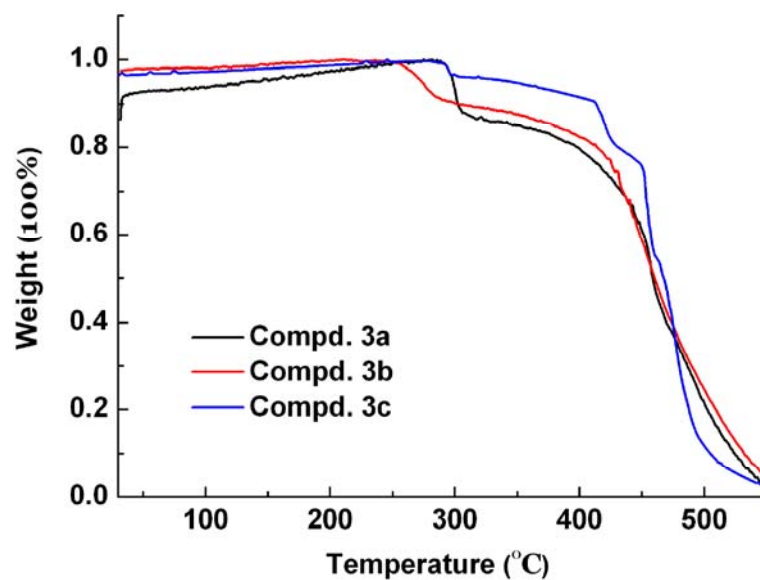

**Fig. S1** Thermal gravimetric analysis (TGA) of compounds **3a-c** performed at a heating rate of  $10\text{ °C min}^{-1}$  under a  $\text{N}_2$  atmosphere with runs recorded from room temperature to  $550\text{ °C}$ .

## 2. DSC data for derivatives 3a-c

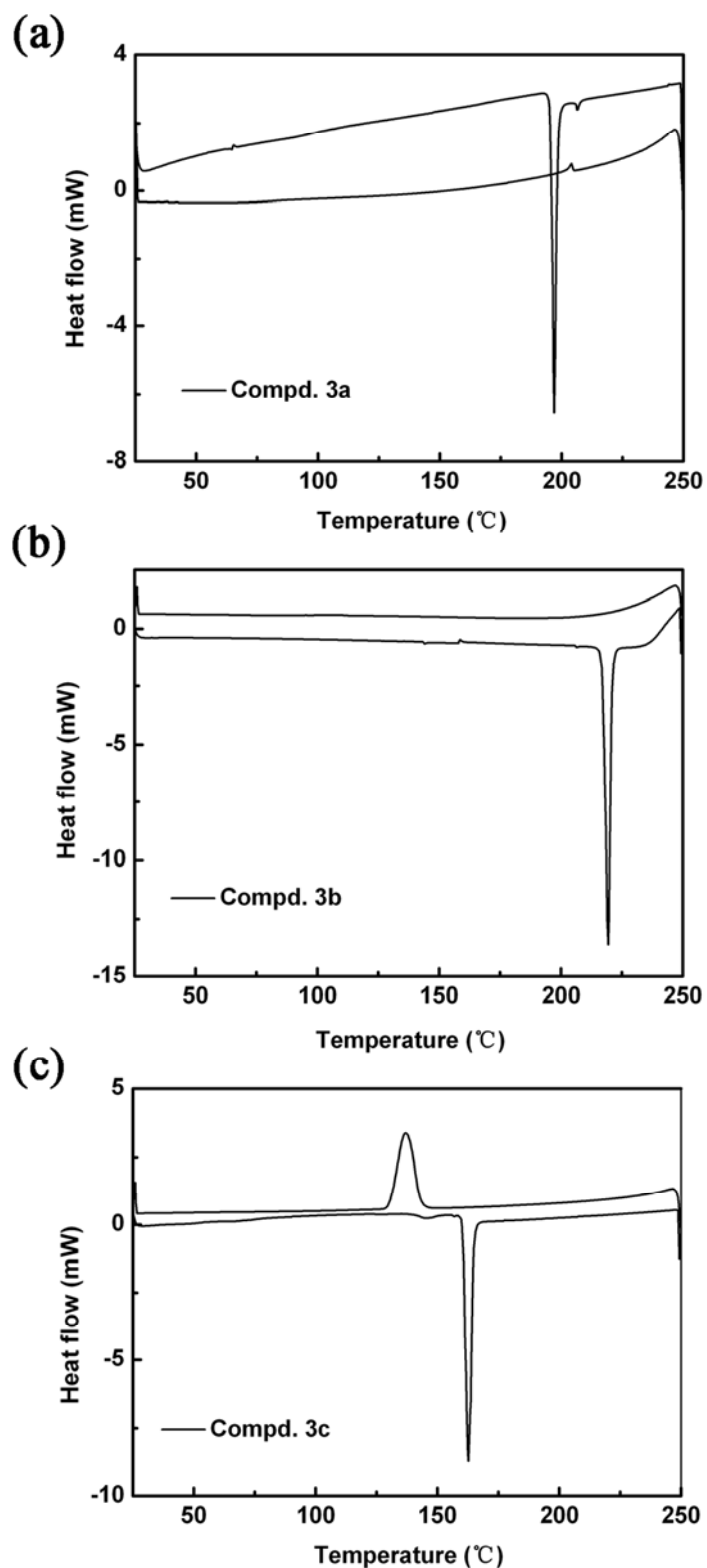

**Fig. S2** Differential scanning calorimetry (DSC) curves of powder of compounds **3a-c** performed under a N<sub>2</sub> atmosphere. Upward peaks indicate exothermic processes, while downward peaks indicate endothermic processes. Scan rate: 10 °C min<sup>-1</sup>.

### 3. Data of X-ray crystallographic analysis

**Table S1.** Crystal data and structure refinement for compound **3b**.

|                                                |                                                               |
|------------------------------------------------|---------------------------------------------------------------|
| Empirical formula                              | C <sub>26</sub> H <sub>23</sub> N <sub>5</sub> S <sub>2</sub> |
| Formula weight                                 | 469.61                                                        |
| T/K                                            | 173(2)                                                        |
| Wavelength, Å                                  | 0.71073                                                       |
| Crystal system                                 | Triclinic                                                     |
| space group                                    | P-1                                                           |
| a, Å                                           | 10.463(2)                                                     |
| b, Å                                           | 11.737(2)                                                     |
| c, Å                                           | 12.856(3)                                                     |
| $\alpha$ , deg                                 | 91.16(3)                                                      |
| $\beta$ , deg                                  | 105.66(3)                                                     |
| $\gamma$ , deg                                 | 114.76(3)                                                     |
| Volume, Å <sup>3</sup>                         | 1364.3(5)                                                     |
| Z                                              | 2                                                             |
| Calculated density, Mg/m <sup>3</sup>          | 1.143                                                         |
| Absorption coefficient, mm <sup>-1</sup>       | 0.216                                                         |
| F(000)                                         | 492                                                           |
| Crystal size, mm                               | 0.42 × 0.28 × 0.24                                            |
| $\theta$ range, deg                            | 1.66 to 27.46                                                 |
| Limiting indices                               | -13 ≤ h ≤ 13, -15 ≤ k ≤ 15,<br>-16 ≤ l ≤ 16                   |
| Reflections collected / unique                 | 15139 / 6219 [R(int) = 0.0447]                                |
| Absorption correction                          | Semi-empirical from equivalents                               |
| Refinement method                              | Full-matrix least-squares on F <sup>2</sup>                   |
| Data / restraints / parameters                 | 6219 / 0 / 298                                                |
| Goodness-of-fit on F <sup>2</sup>              | 1.059                                                         |
| Final R indices [I > 2 $\sigma$ (I)]           | R <sub>1</sub> = 0.0676, wR <sub>2</sub> = 0.1911             |
| R indices (all data)                           | R <sub>1</sub> = 0.0736, wR <sub>2</sub> = 0.1971             |
| Largest diff. peak and hole, e.Å <sup>-3</sup> | 1.523 and -0.480                                              |

#### 4. UV-vis spectra of thin films

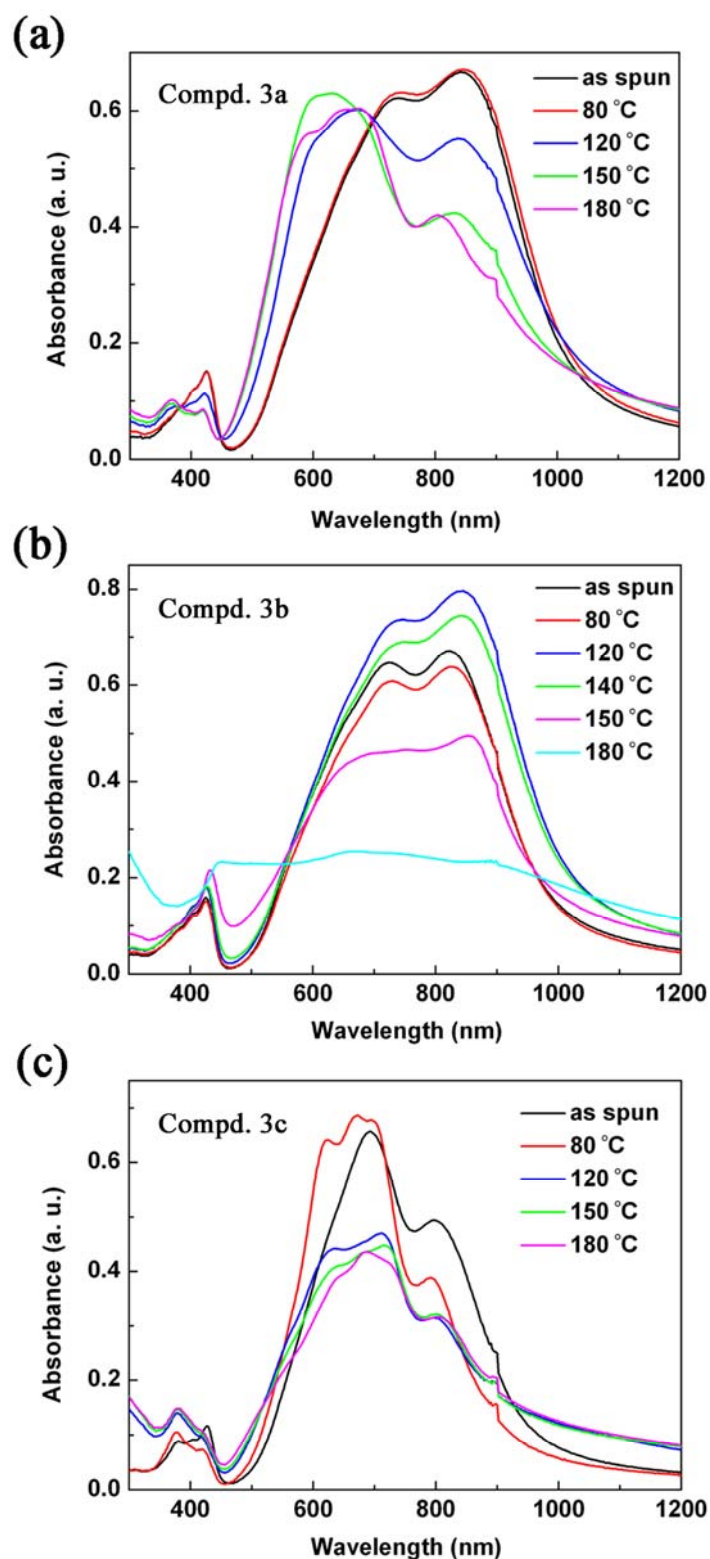

**Fig. S3** UV-vis absorption spectra of thin films of compounds **3a-c** spin-coated on quartz substrates and annealed at different temperatures.

## 5. Structural isomers in solution state

Generally, for oligothiophene-based quinoidal substituted with dicynomethylene, the E/Z isomerism can exist in the thienoquinoidal core parts. Similarly, for our results, we found there are some small  $^1\text{H}$  NMR signals appearing in the aryl portion, which are seemingly signals for impurity, taking compound **3b** as a example, see Fig. S4. However, because the compound was purified by repeated recrystallization and its purity was confirmed by elemental analysis (less than 0.3%), we think there might be some configuration isomers (i.e. *cis-cis*, *cis-trans*, *trans-trans* in terms of the double bonds between thiophene and pyrrole rings, see Fig. S5) co-existing for **3b** in the solution, although data of X-ray crystallographic analysis for **3b** was successfully obtained and the structure for such pyrrole-containing quinoid displays one configuration (*cis-cis*) in the solid state. In order to confirm our consideration about the isomerization phenomenon, NOESY spectrum analysis was carried out: clear correlated peaks between thiophene  $\beta$ -protons  $\text{H}_{\text{b}(\text{b}'\text{'})}$  and methylene protons  $\text{H}_{\text{d}(\text{d}'\text{'})}$  on the first carbon in the alkyl substituent were observed as displayed in Fig. 6 and 7, demonstrating that there are probably two kinds of isomers (eg. *cis-cis* and *cis-trans*) at least co-existing as an equilibrium mixture in the solution.

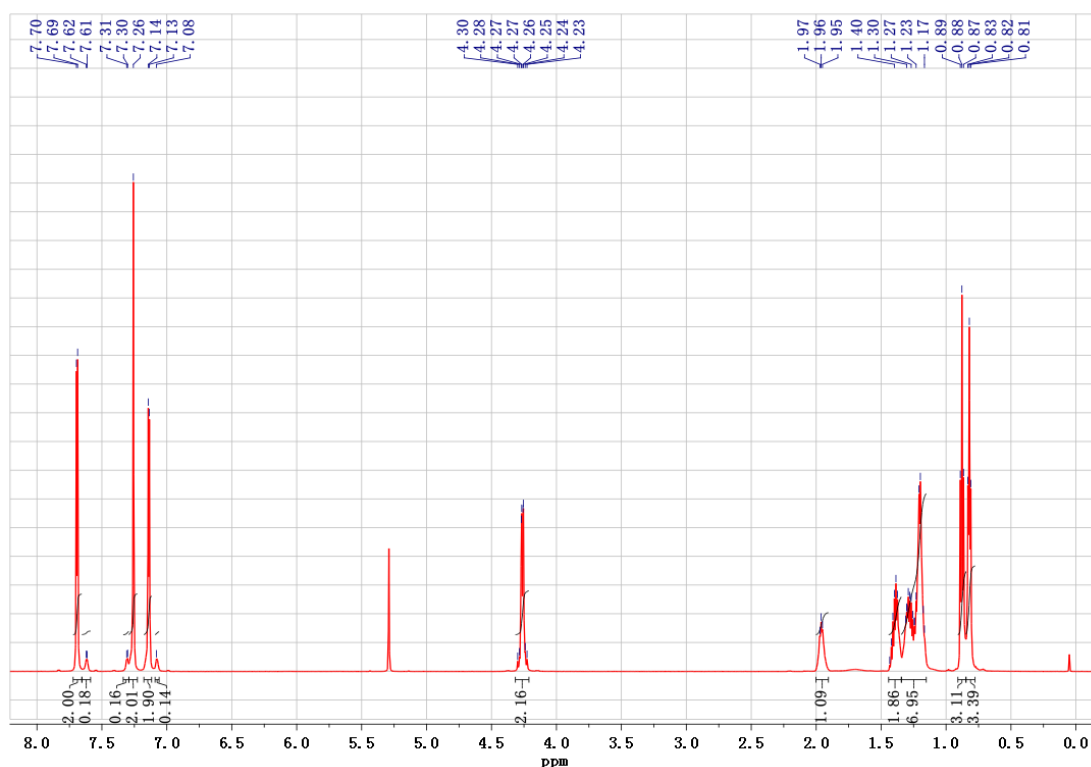

**Fig. S4** The  $^1\text{H}$  NMR spectrum (600 MHz,  $\text{CD}_2\text{Cl}_2$ ) at 298 K for **3b**.

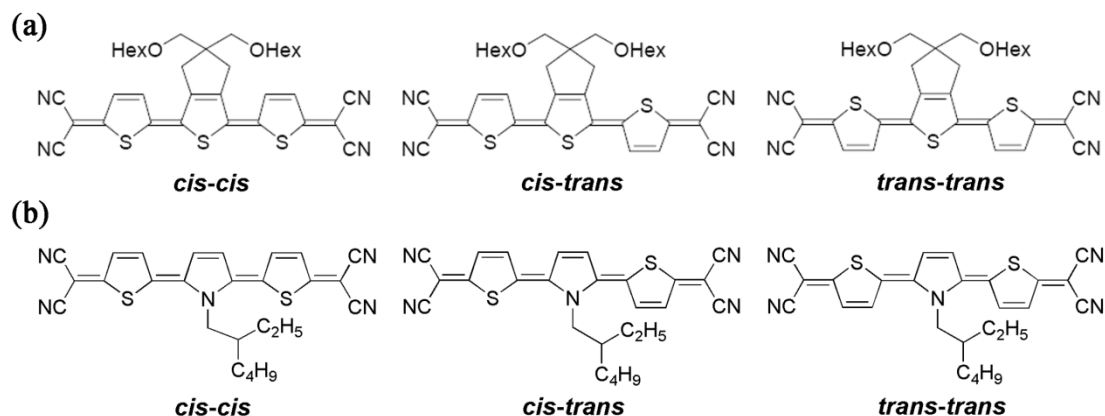

**Fig. S5** (a) Three isomers for a terthienoquinoid as reported by Takimiya's group<sup>1</sup>, and (b) three possible isomers for **3b** in solution.

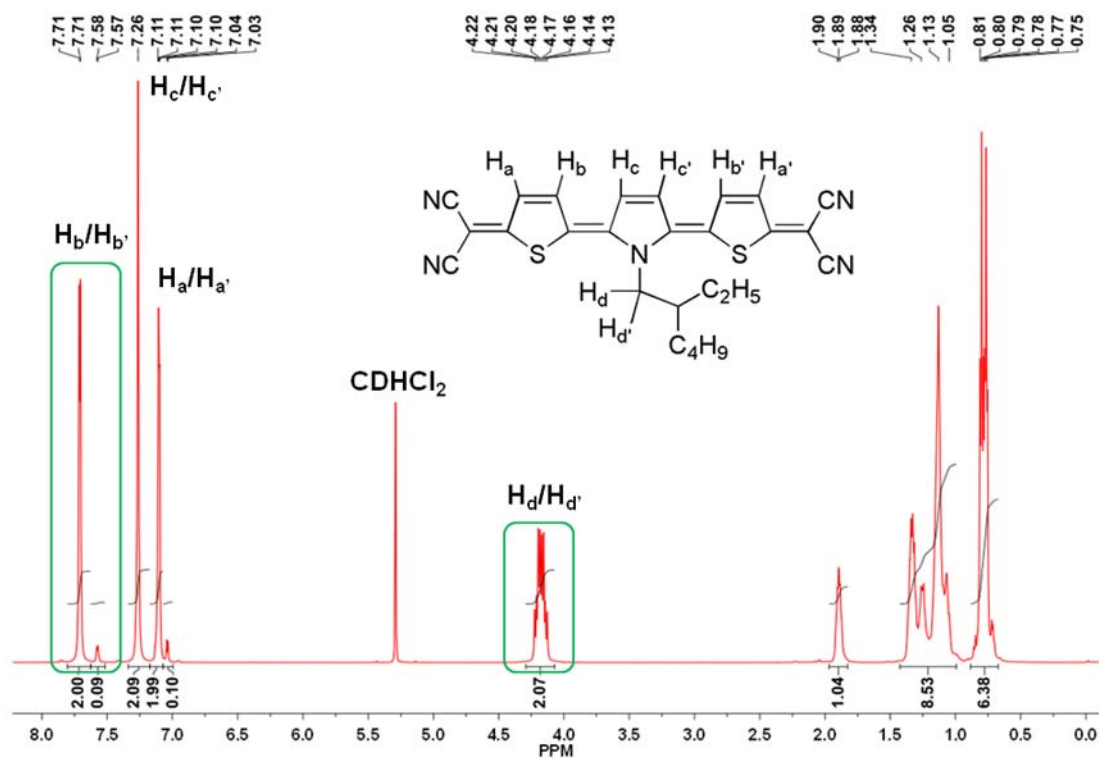

**Fig. S6** The <sup>1</sup>H NMR spectrum (600 MHz, CD<sub>2</sub>Cl<sub>2</sub>) at 213 K for **3b**. Note: Isomer with larger proportion is called Part A and the one with much smaller proportion is called Part B; and the assignment of some key hydrogen atoms are indicated.

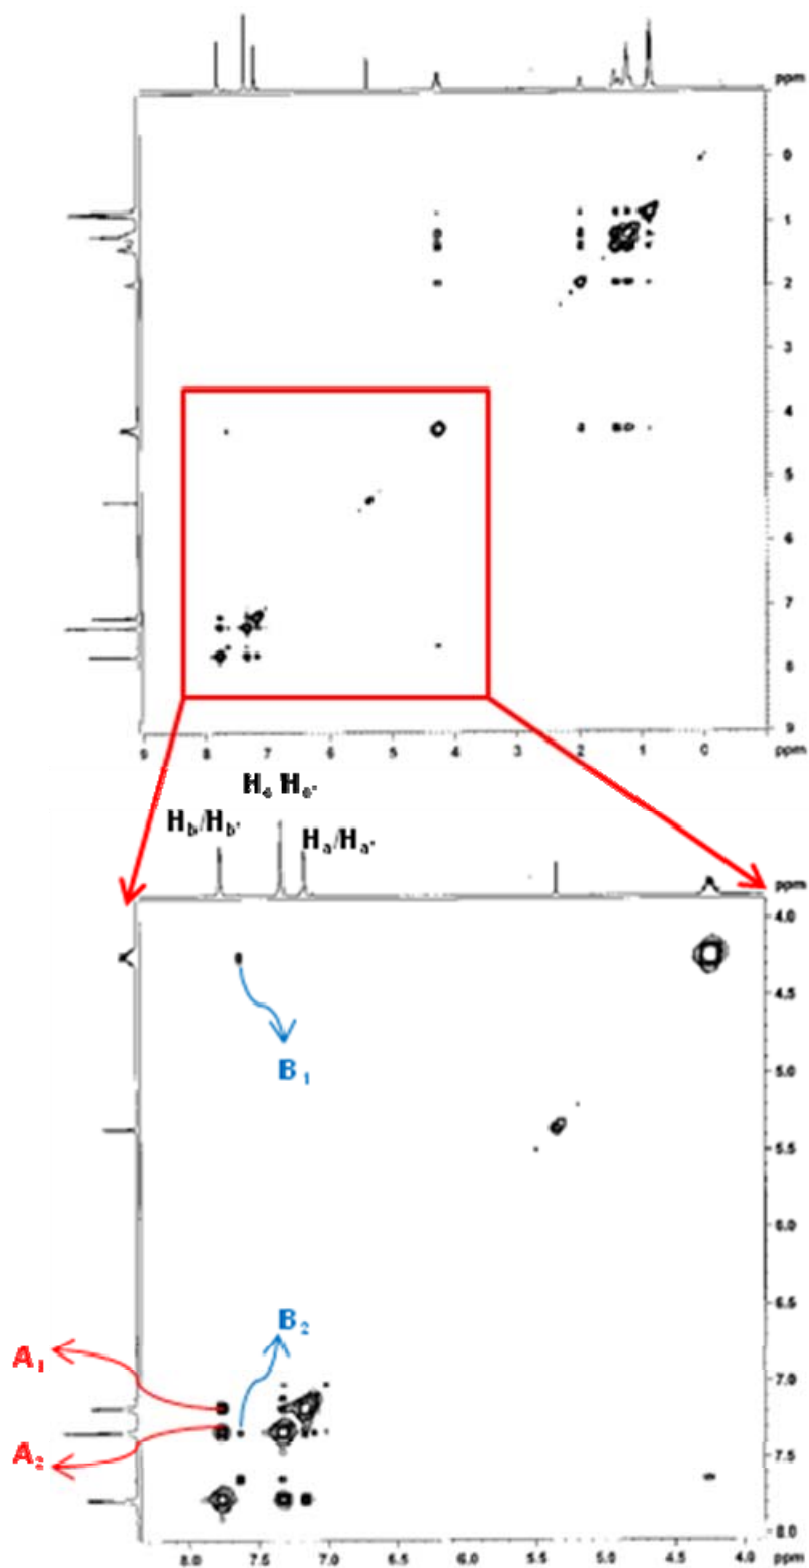

**Fig. S7** The NOESY spectrum (600 MHz, CD<sub>2</sub>Cl<sub>2</sub>) at 213 K for **3b**. *Note*: Correlation peaks A<sub>1</sub> and A<sub>2</sub> indicate Part A exists as a *cis-cis* configuration; Correlation peaks B<sub>1</sub> and B<sub>2</sub> indicate Part B more possibly exists as a *cis-trans* configuration.



## 6. Copies of $^1\text{H}$ NMR and $^{13}\text{C}$ NMR spectra

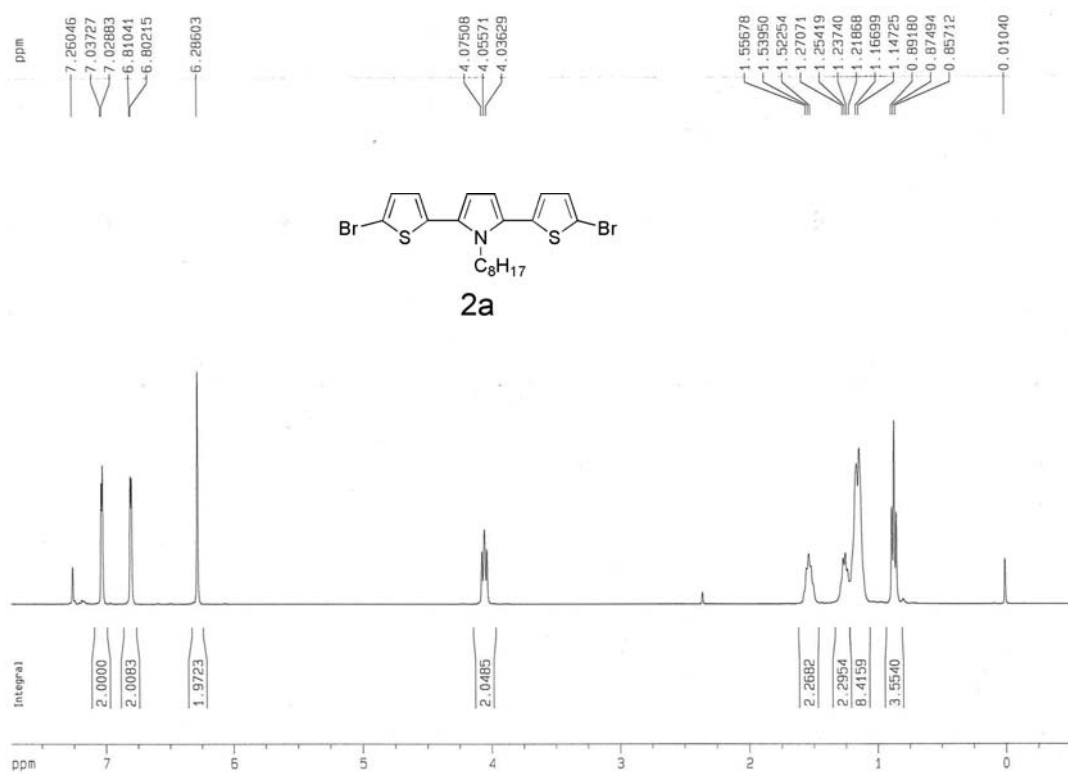

Fig. S8  $^1\text{H}$  NMR spectrum of **2a**.

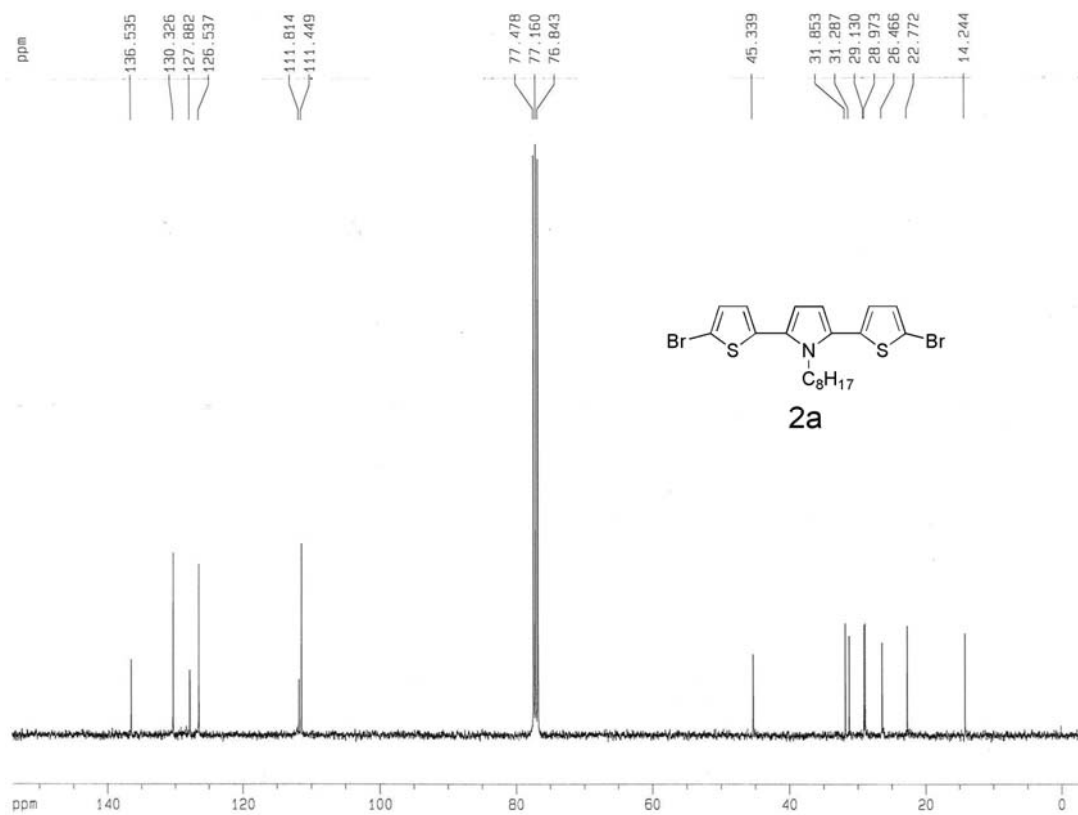

Fig. S9  $^{13}\text{C}$  NMR spectrum of **2a**.

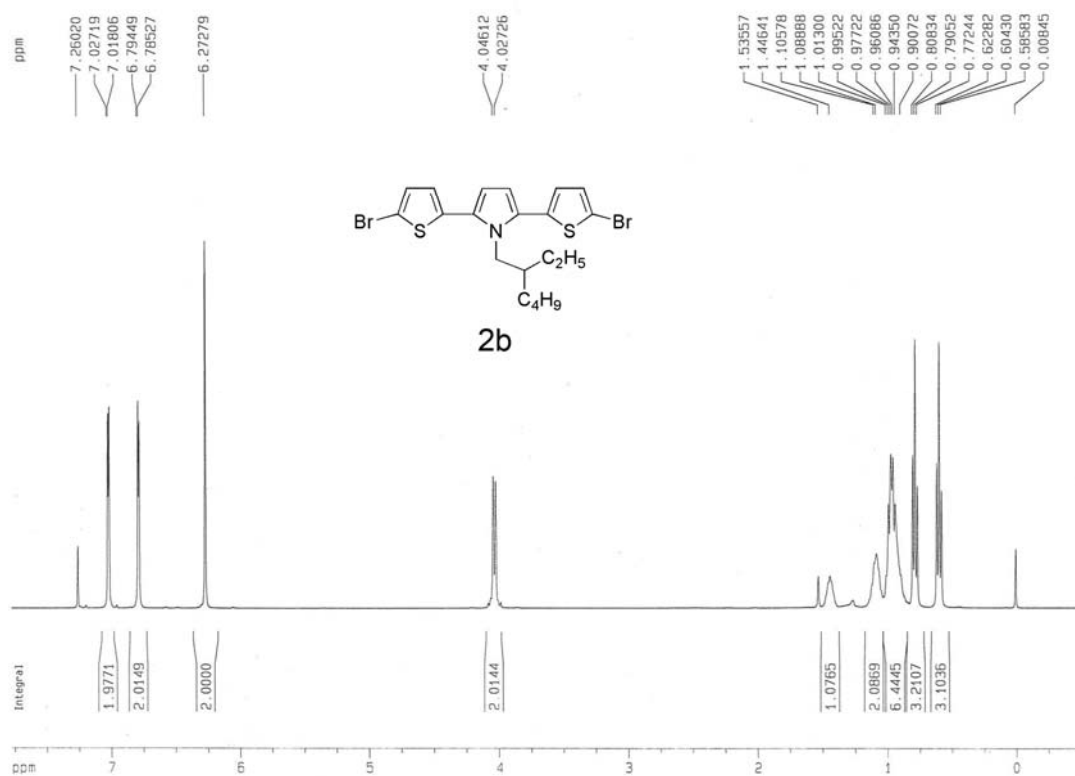

**Fig. S10** <sup>1</sup>H NMR spectrum of **2b**.

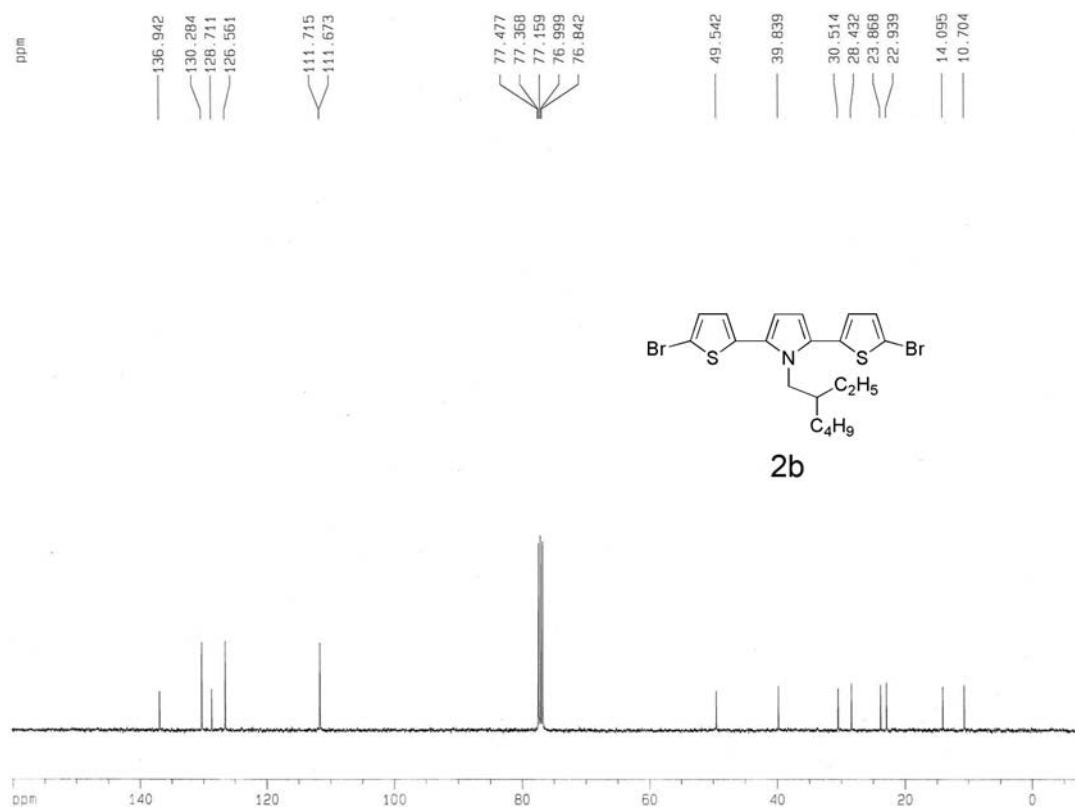

**Fig. S11** <sup>13</sup>C NMR spectrum of **2b**.

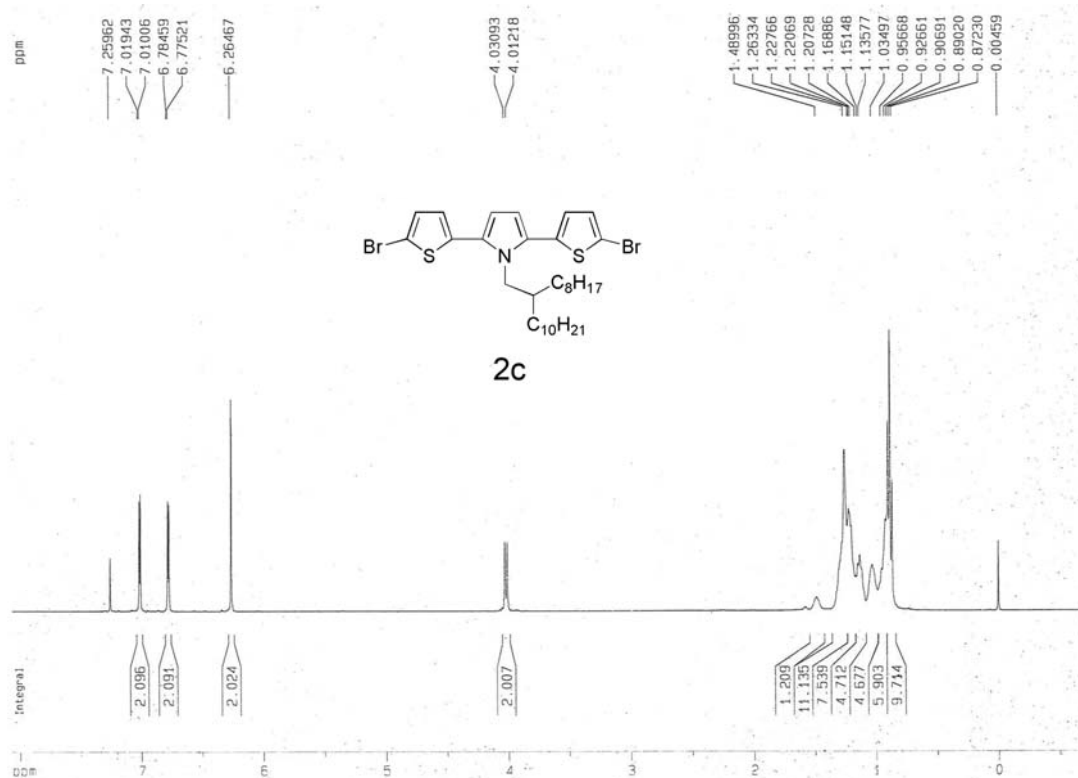

**Fig. S12** <sup>1</sup>H NMR spectrum of **2c**.

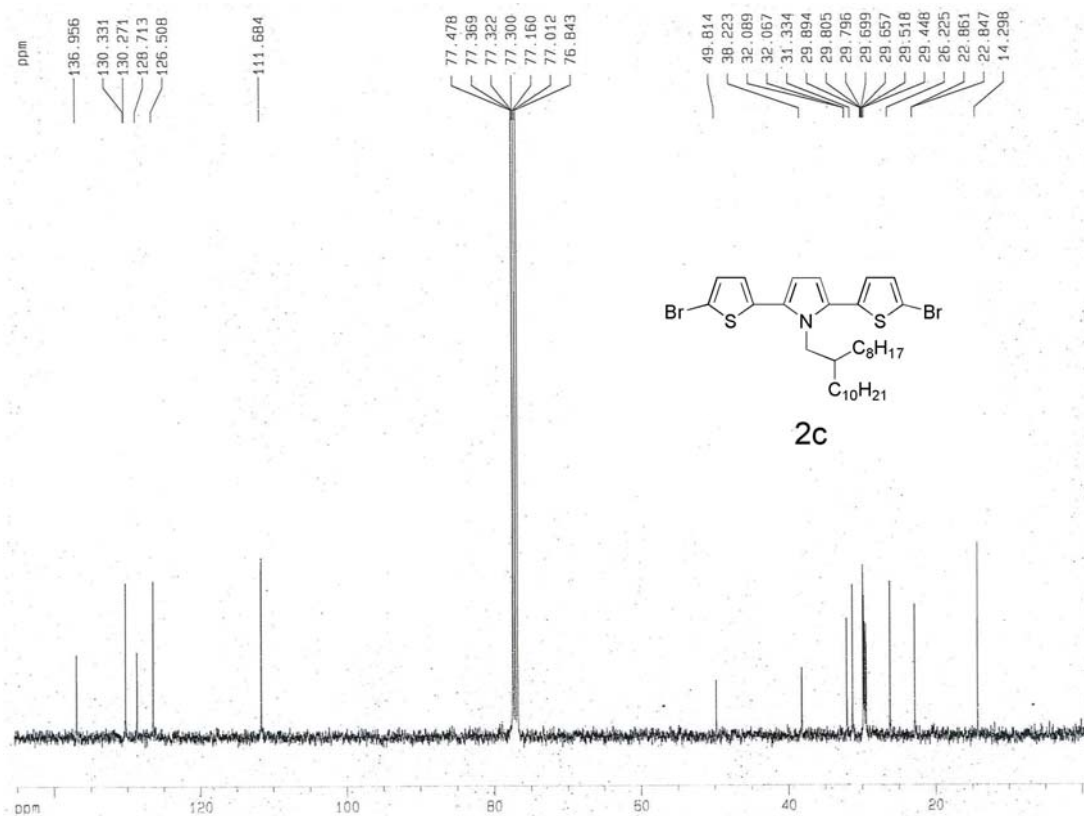

**Fig. S13** <sup>13</sup>C NMR spectrum of **2c**.

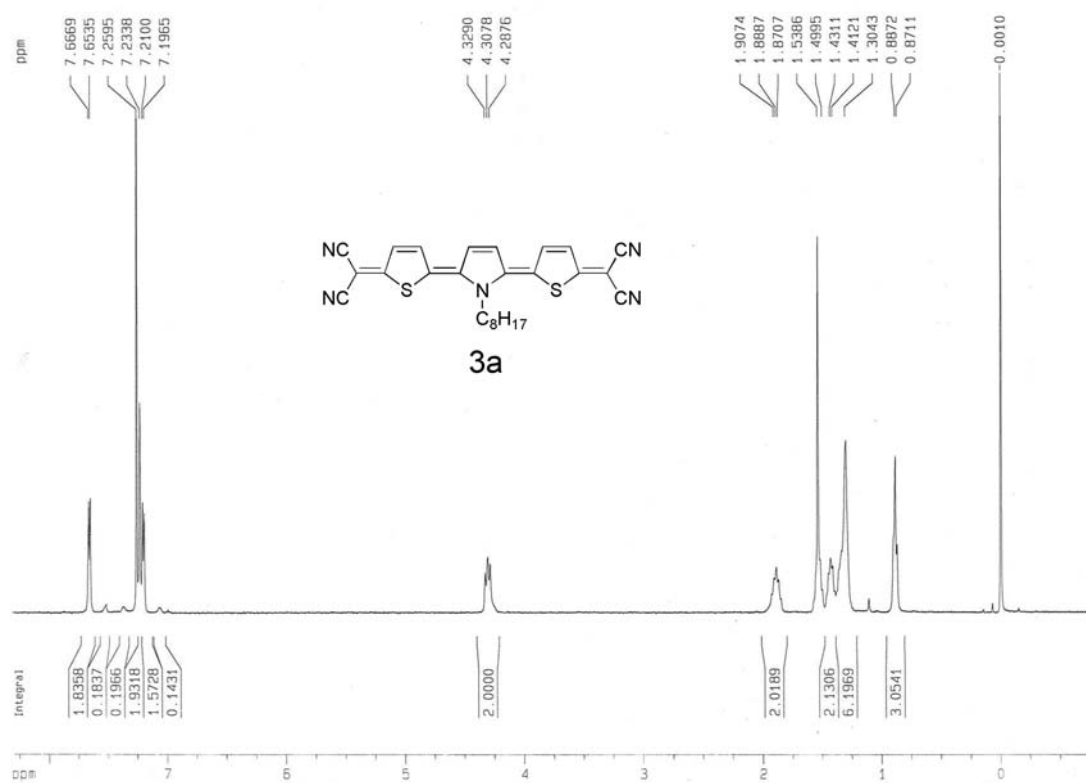

**Fig. S14** <sup>1</sup>H NMR spectrum of **3a**.

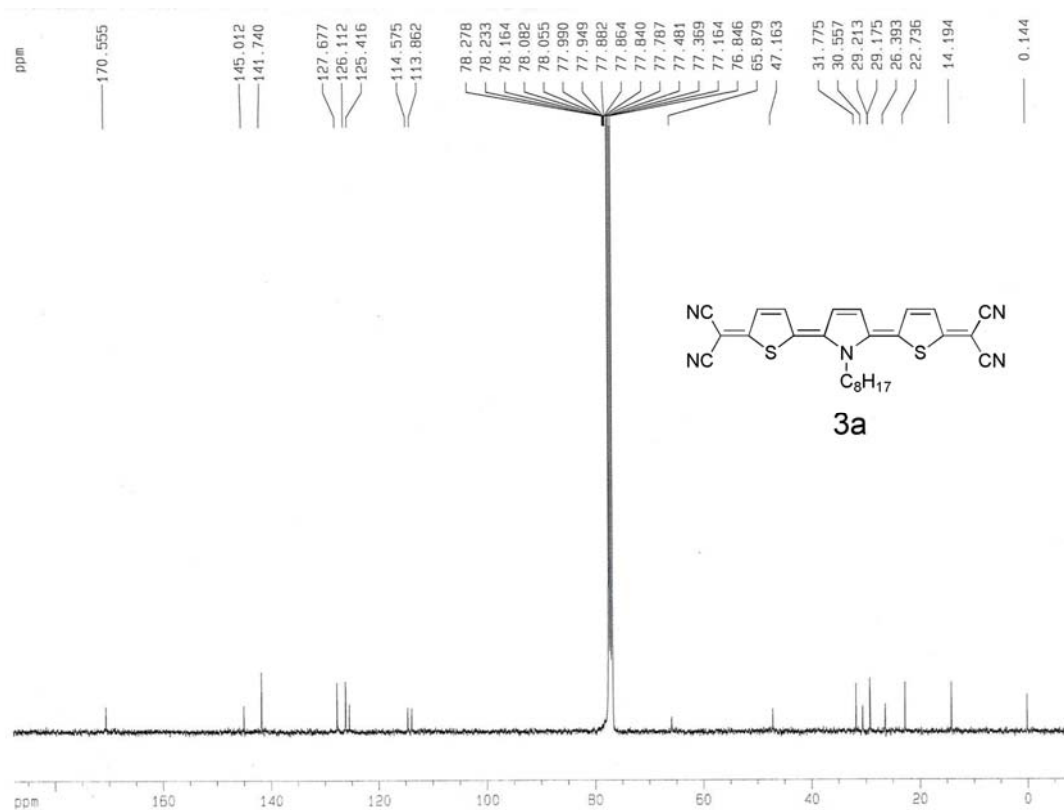

**Fig. S15** <sup>13</sup>C NMR spectrum of **3a**.

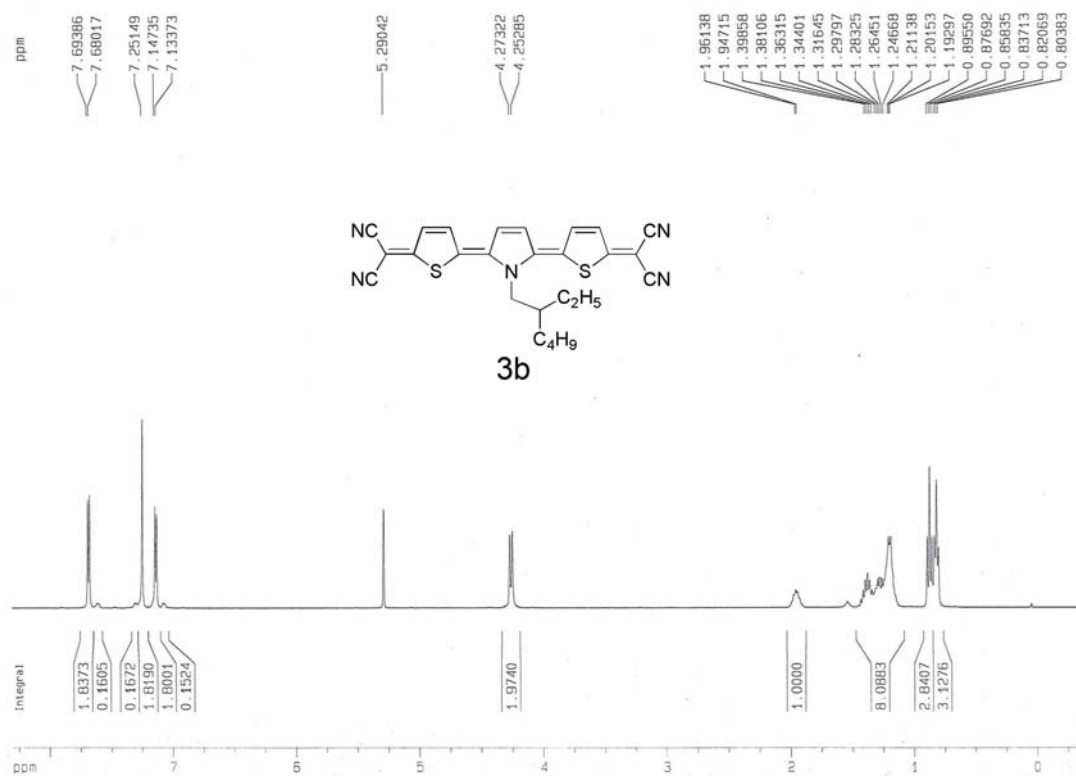

Fig. S16 <sup>1</sup>H NMR spectrum of **3b**.

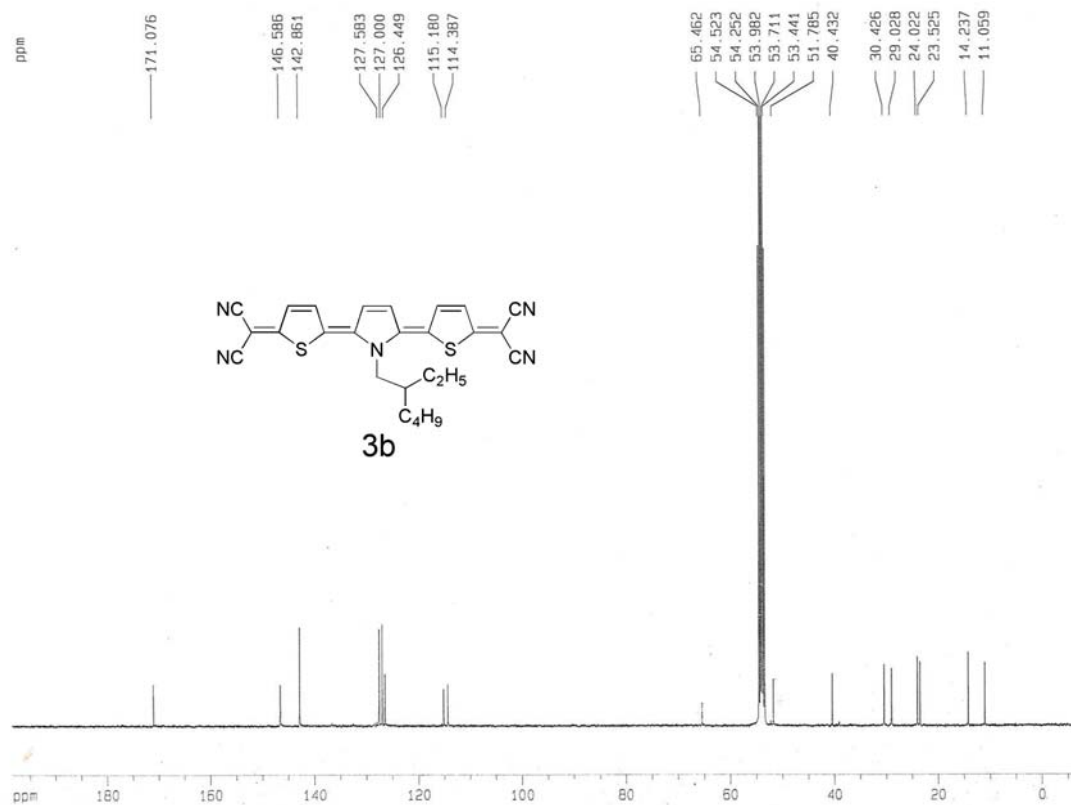

Fig. S17 <sup>13</sup>C NMR spectrum of **3b**.

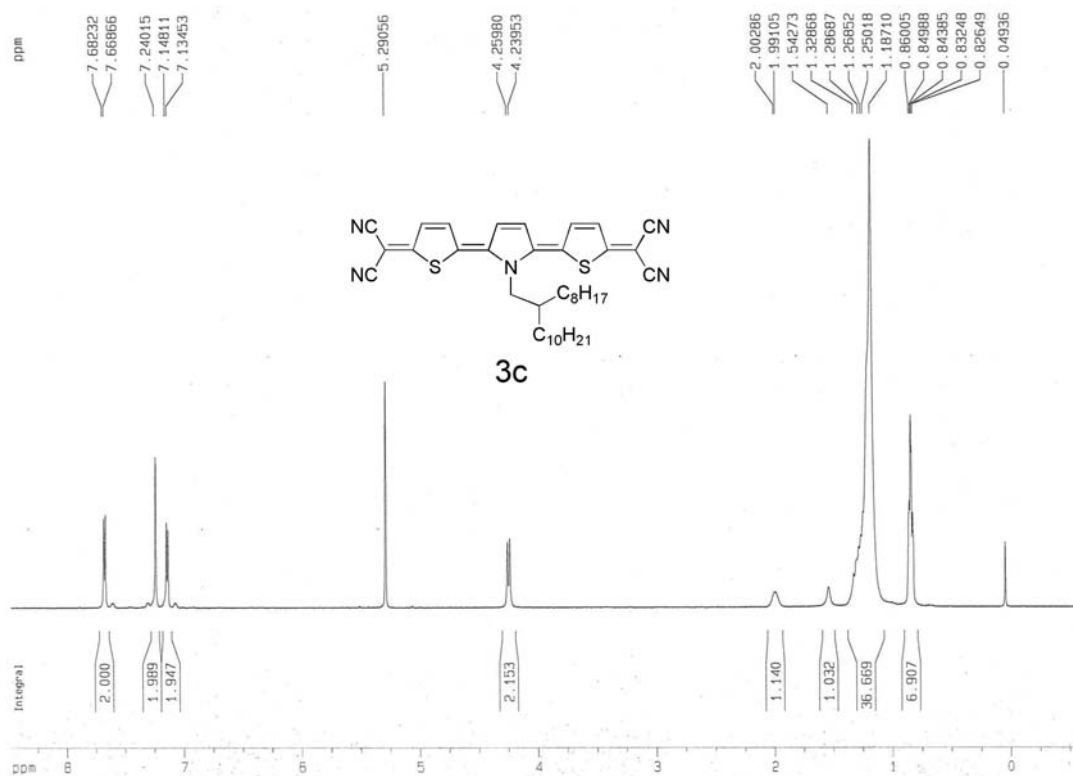

Fig. S18 <sup>1</sup>H NMR spectrum of 3c.

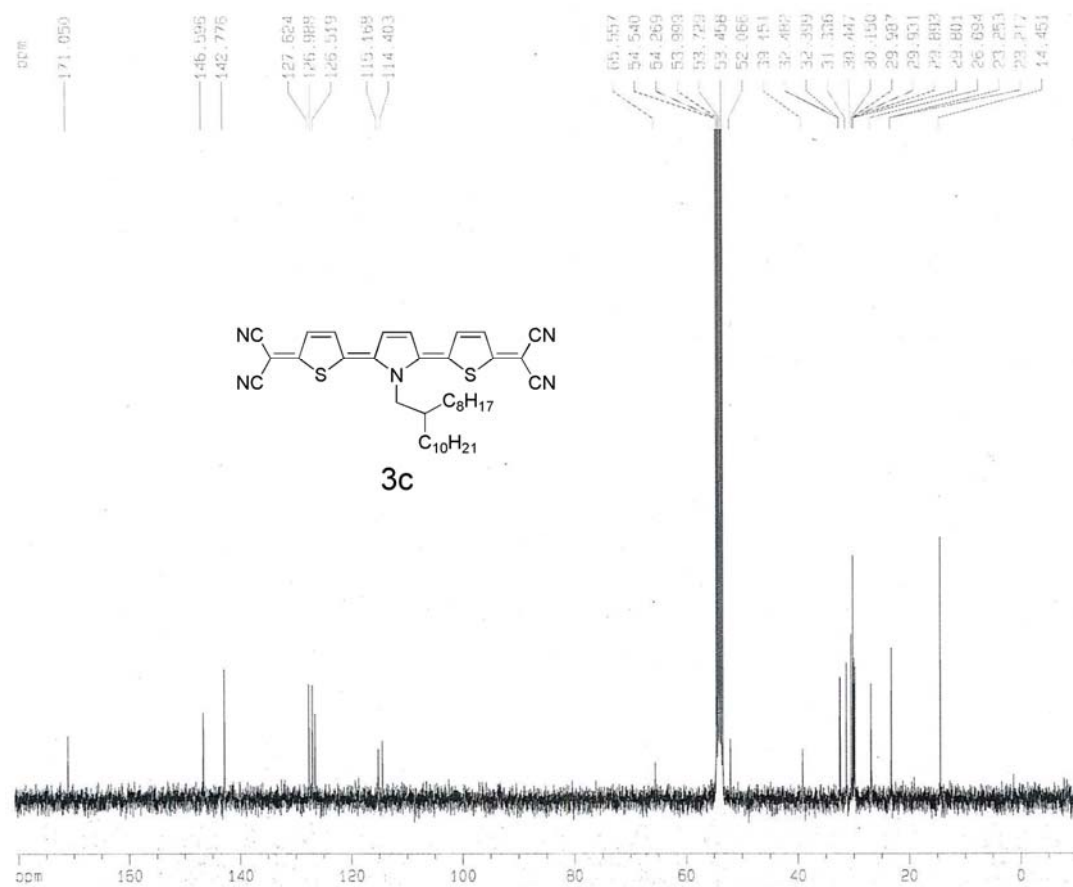

Fig. S19 <sup>13</sup>C NMR spectrum of 3c.

## 7. References

- S1. S. Handa, E. Miyazaki, K. Takimiya and Y. Kunugi, *J. Am. Chem. Soc.*, 2007, **129**, 11684.
